# Supplementary material
Source: bioRxiv or medRxiv preprint supplement (https://www.biorxiv.org/highwire/filestream/13496/field_highwire_adjunct_files/0/049585-1.pdf)
Supplement: Supplementary file [file 049585-1.pdf]

# SUPPLEMENTARY MATERIAL

## From Visual Exploration to Storytelling and Back Again

Samuel Gratzl<sup>1</sup>, Alexander Lex<sup>2</sup>, Nils Gehlenborg<sup>3</sup>, Nicola Cosgrove<sup>1</sup>, and Marc Streit<sup>1\*</sup>

<sup>1</sup>Johannes Kepler University Linz, Austria

<sup>2</sup>University of Utah, United States of America

<sup>3</sup>Harvard Medical School, United States of America

\*Corresponding Author: marc.streit@jku.at

### Gapminder Usage Scenario

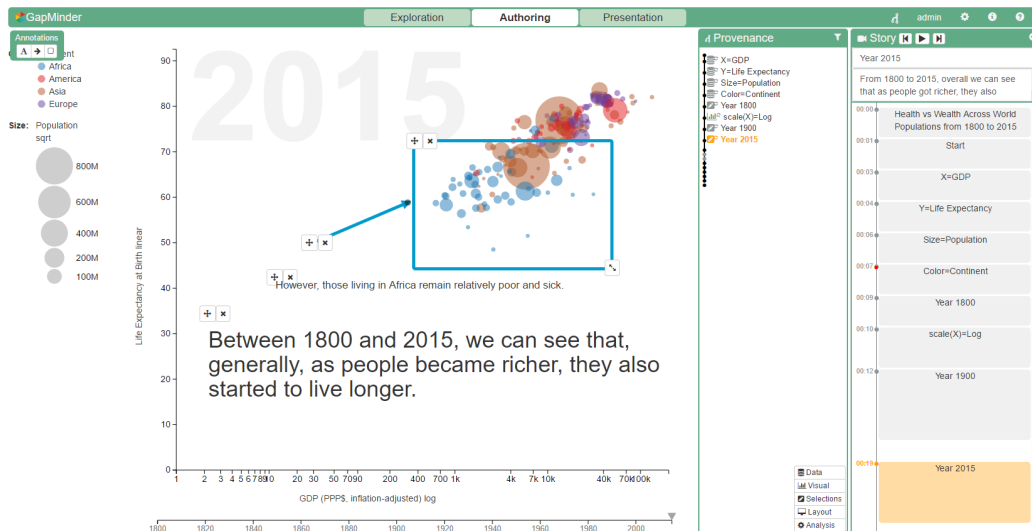

**Figure 1:** Screenshot of the Gapminder-inspired application showing the same state as the usage scenario in authoring mode.

**Vistory:** <http://vistories.org/v/gapminderA>.

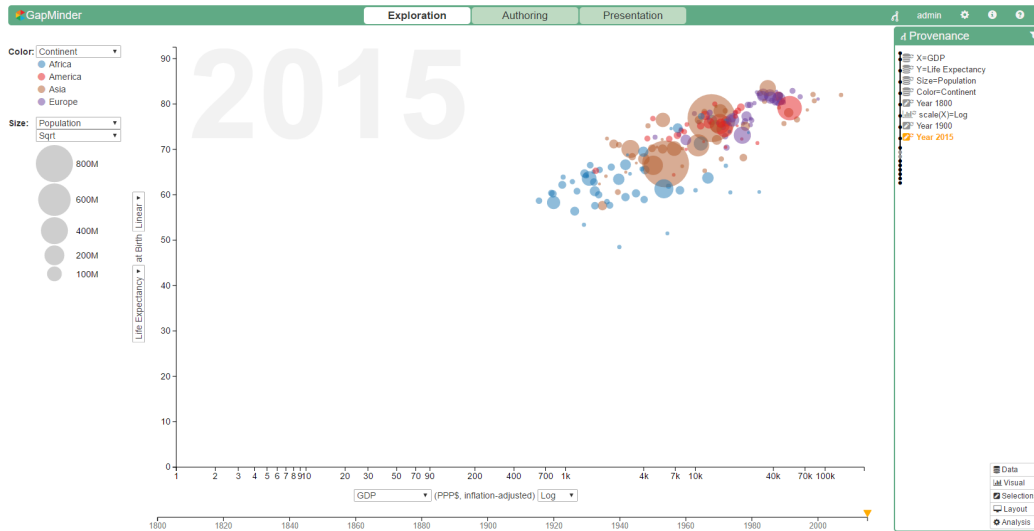

**Figure 2:** Screenshot of the GapMinder-inspired application showing the same state as the usage scenario in exploration mode.

**Vistory:** <http://vistories.org/v/gapminderE>.

## GapMinder Supplementary Figures

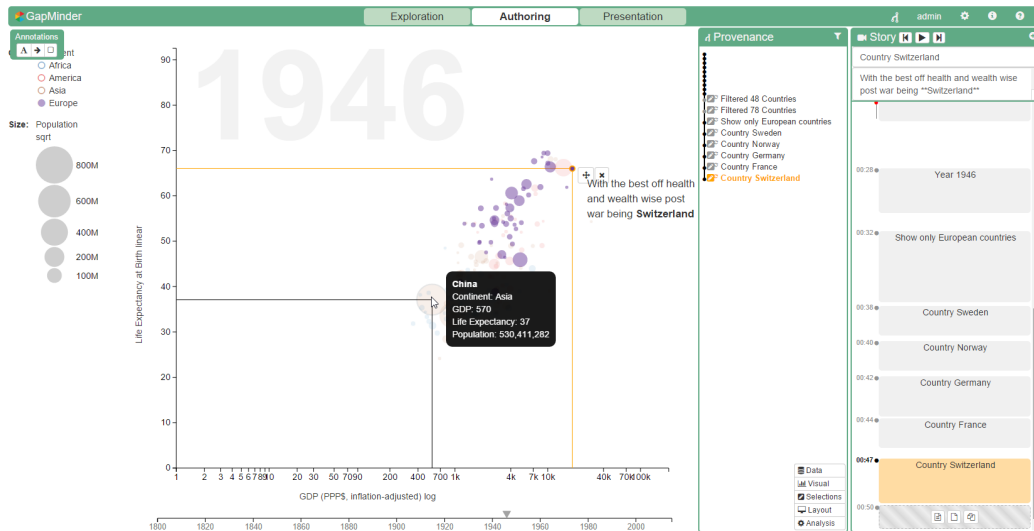

**Figure 3:** Screenshot of the GapMinder-inspired application in authoring mode showing the combination of selection with annotation and custom mouse interaction.

**Vistory:** <http://vistories.org/v/gapminderTooltip>.
